# Supplementary material
Source: PubMed Central journal article supplement (PMC3932877)
Supplement: 1400336111_pnas.201400336SI.pdf [file 1400336111_pnas.201400336SI.pdf]

# Supporting Information

Madej et al. 10.1073/pnas.1400336111

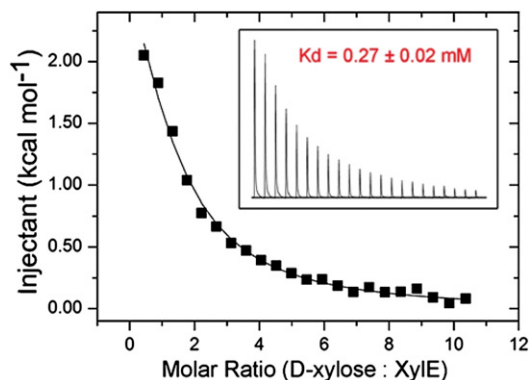

Fig. S1. The binding affinity between D-xylose and XylE with D27N mutant measured by isothermal titration calorimetry.

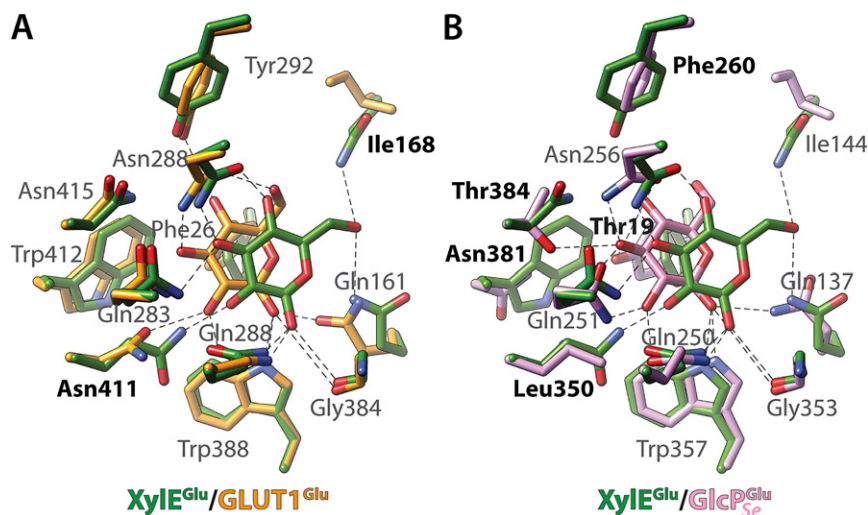

Fig. S2. Comparison of the sugar binding sites. (A) The X-ray structure of XylE with bound D-glucose (PDB ID code 4GBZ; green) is aligned to the comparative model GLUT1 with docked D-glucose (orange). Labels are shown for GLUT1, bold font indicates important differences in GLUT1 (N411, I168) compared with XylE. (B) The X-ray structure of XylE (same as in A; green) is aligned to the comparative model of GlcP<sub>se</sub> in occluded conformation with docked D-glucose (pink). Labels are shown for GlcP<sub>se</sub>, bold font indicates important differences in GlcP<sub>se</sub> (Thr19, L350, N381, T384) compared with GLUT1. Broken lines indicate polar contacts to the ligand. See Fig. 4 for comparison.

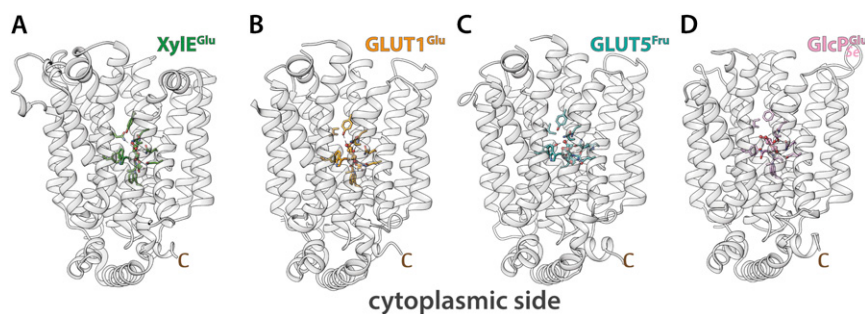

**Fig. S3.** Orientation of the sugar binding sites. (A) X-ray structure of XyleGlu with bound D-glucose (PDB ID code 4GBZ). (B) Comparative model of GLUT1 and (C) comparative model of GLUT5 with docked ligands. (D) Comparative model of GlcPse in occluded conformation with docked D-glucose. Residues providing polar contacts to the ligand are shown as stick model, and the respective ligands are indicated as ball-and-stick model.

**Table S1. Modeling and refinement statistics**

| Modeling and refinement | GLUT1  | GLUT5  | GlcP <sub>se</sub> |
|-------------------------|--------|--------|--------------------|
| Identity to Xyle (%)    | 28.0   | 22.2   | 31.9               |
| Total residues          | 468    | 501    | 467                |
| Modeled residues        | 438    | 456    | 439                |
| Completeness (%)        | 93.6   | 91.0   | 94.0               |
| Z-DOPE                  | −0.343 | −0.293 | −0.668             |
| Ramachandran plot       |        |        |                    |
| Favored (%)             | 95.8   | 94.8   | 96.3               |
| Outliers (%)            | 0.7    | 2.7    | 0.9                |

## Other Supporting Information Files

[Dataset S1 \(DOCX\)](#)
